# Supplementary material for: USPSTF Colorectal Cancer Screening Recommendation and Uptake for Individuals Aged 45 to 49 Years
Source: PubMed Central journal article supplement (PMC11450516; doi:10.1001/jamanetworkopen.2024.36358), 2024-10-03
Supplement: jamanetwopen-e2436358-s001.pdf [file jamanetwopen-e2436358-s001.pdf]

## Supplementary Online Content

Siddique S, Wang R, Yasin F, et al. USPSTF colorectal cancer screening recommendation and uptake for individuals aged 45 to 49 years. *JAMA Netw Open*. 2024;7(10):e2436358. doi:10.1001/jamanetworkopen.2024.36358

**eMethods.** Events of Interest and Determination of High and Average Risk Status

**eTable 1.** Numerators and Denominators Used to Calculate Colorectal Cancer Screening Uptake Among BCBS Beneficiaries Aged 45 to 49 Years

**eTable 2.** Codes Used to Identify Colorectal Cancer Screening–Related Procedures, High-Risk Individuals, and Diagnostic Procedures

**eTable 3.** Changes in Bimonthly Colonoscopy and Stool DNA Tests Before and After the USPSTF Recommendation Among Individuals at Average Risk Aged 45 to 49 Years and Insured by BCBS

**eTable 4.** Percentage of BCBS Beneficiaries Aged 45 to 49 Years Between May 2021 and December 2022 Who Received Any Screening for Colorectal Cancer Before Age 50 Years

**eTable 5.** CRC Screening Uptake by Social Deprivation Index Within Each Race and Ethnicity Group Among BCBS Beneficiaries Aged 45 to 49 Years During the Postrecommendation Period

**eFigure.** Changes in Colorectal Cancer Screening Uptake Among BCBS Axis Beneficiaries Aged 45 to 49 Years With Average Risk of Colorectal Cancer, Stratified by Screening Modality

**eReferences**

This supplementary material has been provided by the authors to give readers additional information about their work.

**eMethods:** Events of interest and determination of high and average risk status

### *Events of Interest*

Several events which might impact CRC screening, including the COVID-19 pandemic, occurred in our study period: 1) ACS recommendation encouraging CRC screening among individuals aged  $\geq 45$  years (May 2018); 2) first wave of COVID-19 outbreak (March – April 2020); 3) second wave of COVID-19 outbreak (January – February 2021); 4) USPSTF recommendation for screening among individuals aged  $\geq 45$  years (May 2021); and 5) third wave of COVID-19 outbreak (January – March 2022).<sup>1-3</sup> Upon consideration of these critical events, the USPSTF 2021 recommendation was chosen as the primary event of interest due to its implications on insurance coverage for CRC screening. Under section 2713 of the Public Health Service Act, non-grandfathered group health plans and health insurance coverage offered in the individual and group market are mandated to cover the cost of preventive services that have a rating of “A” or “B” in the current recommendations of the USPSTF.<sup>4</sup>

### *Risk Status*

As the USPSTF 2021 recommendation for starting CRC screening at the age of 45 years applied to individuals who are at average risk for CRC, we assessed an individual's CRC risk using claims data. High-risk individuals were identified based on the following criteria: history of CRC, colorectal polyp, irritable bowel disease, family history of gastrointestinal cancer, and genetic susceptibility to other malignant neoplasms.<sup>5</sup> (eTable 2) Any individual who was not identified as high-risk was considered to be average-risk. Screening recommendations for high-risk individuals vary based on which condition qualifies them as “high risk” and the age at diagnosis of the relative who had the related condition. For example, in 2017 the US Multi-Society Task Force on Colorectal Cancer recommended that high risk individuals, such as persons with a family history of CRC are recommended to undergo screening by colonoscopy

every 5 years, beginning 10 years before the age at diagnosis of the youngest affected relative or age 40, whichever is earlier.<sup>6,7</sup> Due to differences in screening recommendations for high-risk individuals, our analysis primarily focused on individuals with average-risk of CRC.

**eTable 1.** Numerators and denominators used to calculate colorectal cancer screening uptake among BCBS beneficiaries aged 45-49 years

| Month   | Total Number of Eligible Individuals | Total Number of Individuals Receiving Screening | Uptake (% Screened) |
|---------|--------------------------------------|-------------------------------------------------|---------------------|
| 2017/01 | 3,180,244                            | 18,389                                          | 0.58%               |
| 2017/03 | 3,206,171                            | 19,103                                          | 0.60%               |
| 2017/05 | 3,213,109                            | 19,259                                          | 0.60%               |
| 2017/07 | 3,217,440                            | 18,268                                          | 0.57%               |
| 2017/09 | 3,220,400                            | 18,485                                          | 0.57%               |
| 2017/11 | 3,218,827                            | 18,762                                          | 0.58%               |
| 2018/01 | 3,339,576                            | 17,054                                          | 0.51%               |
| 2018/03 | 3,358,315                            | 17,782                                          | 0.53%               |
| 2018/05 | 3,353,559                            | 18,046                                          | 0.54%               |
| 2018/07 | 3,351,205                            | 19,693                                          | 0.59%               |
| 2018/09 | 3,357,619                            | 20,058                                          | 0.60%               |
| 2018/11 | 3,353,720                            | 19,944                                          | 0.59%               |
| 2019/01 | 3,439,980                            | 19,036                                          | 0.55%               |
| 2019/03 | 3,430,020                            | 20,058                                          | 0.58%               |
| 2019/05 | 3,410,251                            | 19,151                                          | 0.56%               |
| 2019/07 | 3,395,991                            | 20,050                                          | 0.59%               |
| 2019/09 | 3,379,954                            | 20,154                                          | 0.60%               |
| 2019/11 | 3,378,961                            | 20,335                                          | 0.60%               |
| 2020/01 | 3,408,317                            | 19,274                                          | 0.57%               |
| 2020/03 | 3,411,027                            | 8,340                                           | 0.24%               |
| 2020/05 | 3,416,958                            | 12,826                                          | 0.38%               |
| 2020/07 | 3,411,144                            | 17,822                                          | 0.52%               |
| 2020/09 | 3,389,059                            | 21,379                                          | 0.63%               |
| 2020/11 | 3,371,472                            | 21,421                                          | 0.64%               |
| 2021/01 | 3,417,448                            | 19,239                                          | 0.56%               |
| 2021/03 | 3,402,424                            | 24,743                                          | 0.73%               |
| 2021/05 | 3,349,652                            | 23,920                                          | 0.71%               |
| 2021/07 | 3,301,388                            | 29,517                                          | 0.89%               |
| 2021/09 | 3,253,950                            | 36,812                                          | 1.13%               |
| 2021/11 | 3,220,288                            | 43,607                                          | 1.35%               |
| 2022/01 | 3,211,754                            | 44,069                                          | 1.37%               |
| 2022/03 | 3,185,021                            | 57,876                                          | 1.82%               |
| 2022/05 | 3,144,605                            | 58,761                                          | 1.87%               |
| 2022/07 | 3,115,020                            | 62,280                                          | 2.00%               |
| 2022/09 | 3,089,911                            | 68,368                                          | 2.21%               |
| 2022/11 | 3,070,866                            | 73,996                                          | 2.41%               |

**eTable 2. Codes used to identify colorectal cancer screening related procedures, high-risk individuals, and diagnostic procedures**

| <b>Codes used to identify colorectal cancer screening</b> |                  |                                                                                                                                                                                                    |
|-----------------------------------------------------------|------------------|----------------------------------------------------------------------------------------------------------------------------------------------------------------------------------------------------|
| <b>Procedure Name</b>                                     | <b>Code Type</b> | <b>Code</b>                                                                                                                                                                                        |
| Fecal occult blood test                                   | CPT/HCPCS        | G0327, G0107, 82270, 82271, 82272, 82273                                                                                                                                                           |
| Fecal immunochemical test                                 | CPT/HCPCS        | G0328, 82274                                                                                                                                                                                       |
| Stool DNA test (Cologuard®)                               | CPT/HCPCS        | 81528, G0464, S3890 ALSO BY NPI                                                                                                                                                                    |
| Flexible sigmoidoscopy                                    | CPT/HCPCS        | G0104, G6022, 45300, 45303, 45305, 45307, 45308, 45309, 45315, 45317, 45320, 45321, 45327, 45330, 45331, 45332, 45333, 45334, 45335, 45337, 45338, 45339, 45340, 45341, 45342, 45345, 45346, 45349 |
| Double-contrast barium enema                              | CPT/HCPCS        | G0106, G0120, G0122, 74270, 74280                                                                                                                                                                  |
| Colonoscopy                                               | CPT/HCPCS        | G0105, G0121, G6024, 44388-44394, 44397, 45355, 45378, 45379, 45380, 45381, 45382, 45383, 45384, 45385, 45386, 45387, 45388, 45390, 45391, 45392                                                   |
| CT colonography                                           | CPT/HCPCS        | 74263, 0066T                                                                                                                                                                                       |
| <b>Codes used to identify high risk individuals</b>       |                  |                                                                                                                                                                                                    |
| <b>High-risk Condition</b>                                | <b>Code Type</b> | <b>Codes</b>                                                                                                                                                                                       |
| Colorectal polyp                                          | ICD-9-CM         | 2113, 2114, 5690, 5564, 56949, 20950–20957                                                                                                                                                         |
|                                                           | ICD-10-CM        | D120–D128, K5140, K51411–K51414, K51418, K51419, K620, K621, K635, D3A020–D3A026, D3A029                                                                                                           |
| History of colorectal polyp                               | ICD-9-CM         | V1272                                                                                                                                                                                              |
|                                                           | ICD-10-CM        | Z86010                                                                                                                                                                                             |
| Colorectal cancer                                         | ICD-9-CM         | 1530–1541, 1548, 1975, 2303, 2304, 20910–20917                                                                                                                                                     |
|                                                           | ICD-10-CM        | C180–C189, C19, C20, C212, C218, C785, C7A020–C7A026, C7A029, D0140, D0149, D010–D012                                                                                                              |
| History of colorectal cancer                              | ICD-9-CM         | V1005, V1006                                                                                                                                                                                       |
|                                                           | ICD-10-CM        | Z85030, Z85038, Z85040, Z85048, Z8509                                                                                                                                                              |
| Family history of gastrointestinal cancer                 | ICD-9-CM         | V160                                                                                                                                                                                               |
|                                                           | ICD-10-CM        | Z800                                                                                                                                                                                               |
| Irritable bowel disease                                   | ICD-9-CM         | 5550–5552, 5559–5563, 5565, 5566, 5568, 5569                                                                                                                                                       |

ICD-10-CM

K5000, K50011–K50014, K50018, K50019, K5010, K5011, K50111–K50114, K50118, K50119, K508, K5080, K50811–K50814, K50818, K50819, K5090, K50911–K50914, K50918, K50919, K5100, K51011–K51014, K51018, K51019, K5120, K51211–K51214, K51218, K51219, K513, K5130, K51311–K51314, K51318, K51319, K5150, K51511–K51514, K51518, K51519, K5180, K51811–K51814, K51818, K51819, K5190, K51911–K51914, K51918, K51919, K5289

Genetic susceptibility to other malignant neoplasm

ICD-9-CM  
ICD-10-CM

V8409  
Z1509

**Codes used to distinguish diagnostic procedures from screening related procedures**

| Condition                        | Code Type | Code                                                                                                                       |
|----------------------------------|-----------|----------------------------------------------------------------------------------------------------------------------------|
| Abdominal Pain                   | ICD-9-CM  | 787.3, 789.6, 789                                                                                                          |
| Altered bowel habits             | ICD-10-CM | R14, R10.81, R10.82                                                                                                        |
|                                  | ICD-9-CM  | 564,787                                                                                                                    |
| Gastrointestinal bleeding        | ICD-10-CM | K52.29, K52.89, K58, K59 EXCEPT K59.31, R11.0, R11.10, R11.11-2, R11.14-5, R12-5, R19.11-12, R19.15, R19.4-5, R19.7, R19.8 |
|                                  | ICD-9-CM  | 578                                                                                                                        |
| Positive fecal occult blood test | ICD-10-CM | K92.0-2                                                                                                                    |
|                                  | ICD-9-CM  | 792.1                                                                                                                      |
| Weight loss                      | ICD-10-CM | R19.5                                                                                                                      |
|                                  | ICD-9-CM  | 783.2                                                                                                                      |
| Iron deficiency anemia           | ICD-10-CM | R63.4, R63.6                                                                                                               |
|                                  | ICD-9-CM  | 280                                                                                                                        |
| Anemia unspecified               | ICD-10-CM | D50                                                                                                                        |
|                                  | ICD-9-CM  | 285.9                                                                                                                      |
| Sigmoidoscopy                    | ICD-10-CM | D64.9                                                                                                                      |
|                                  | ICD-9-CM  | 45.24, 48.21-4                                                                                                             |
|                                  | ICD-10-CM | 0DJD8ZZ, 0D9P3ZX                                                                                                           |

**eTable 3. Changes in Bimonthly Colonoscopy and Stool DNA Tests Before and After the USPSTF Recommendation (May 2018 - December 2019 vs. May 2021 - December 2022) Among Average-Risk Individuals Aged 45-49 years and Insured by Blue Cross Blue Shield**

|                                       | Colonoscopy                                            |                                  |                                   |                                                        |                                  |                                   |                                               | Bimonthly Percentage Change (%; 95% CI) <sup>b</sup> |
|---------------------------------------|--------------------------------------------------------|----------------------------------|-----------------------------------|--------------------------------------------------------|----------------------------------|-----------------------------------|-----------------------------------------------|------------------------------------------------------|
|                                       | Pre-Recommendation<br>(41.3% of all screening)         |                                  |                                   | Post-Recommendation<br>(52.7% of all screening)        |                                  |                                   | P-value<br>Comparing<br>Pre- vs<br>Post-Onset |                                                      |
|                                       | Mean<br>Frequency of<br>Beneficiaries<br>Screened (SD) | Mean CRC<br>Screening<br>(%, SD) | P-value<br>Comparing<br>Subgroups | Mean<br>Frequency of<br>Beneficiaries<br>Screened (SD) | Mean CRC<br>Screening (%,<br>SD) | P-value<br>Comparing<br>Subgroups |                                               |                                                      |
| <b>Overall</b>                        | 6,149 (723)                                            | 0.19 (0.02)                      |                                   | 18,166<br>(11,455)                                     | 0.62 (0.42)                      |                                   | <0.001                                        | 0.124 (0.118, 0.130)                                 |
| <b>Sex</b>                            |                                                        |                                  |                                   |                                                        |                                  |                                   |                                               |                                                      |
| Females                               | 2,828 (368)                                            | 0.18 (0.02)                      | Ref                               | 8,701 (5,731)                                          | 0.60 (0.42)                      | Ref                               | <0.001                                        | 0.127 (0.120, 0.133)                                 |
| Males                                 | 3,321 (368)                                            | 0.21 (0.02)                      | <0.001                            | 9,465 (5,734)                                          | 0.65 (0.42)                      | 0.74                              | <0.001                                        | 0.123 (0.115, 0.128)                                 |
| <b>Social Deprivation Index</b>       |                                                        |                                  |                                   |                                                        |                                  |                                   |                                               |                                                      |
| 1st (highest SES)                     | 2,081 (283)                                            | 0.24 (0.03)                      | Ref                               | 6,406 (4,083)                                          | 0.80 (0.51)                      | Ref                               | <0.001                                        | 0.162 (0.154, 0.170)                                 |
| 2nd                                   | 1,420 (153)                                            | 0.20 (0.02)                      | <0.001                            | 4,191 (2,683)                                          | 0.64 (0.43)                      | 0.37                              | <0.001                                        | 0.130 (0.124, 0.136)                                 |
| 3rd                                   | 1,143 (119)                                            | 0.18 (0.02)                      | <0.001                            | 3,326 (2,127)                                          | 0.56 (0.38)                      | 0.17                              | <0.001                                        | 0.114 (0.109, 0.120)                                 |
| 4th                                   | 884 (106)                                              | 0.16 (0.02)                      | <0.001                            | 2,475 (1,524)                                          | 0.50 (0.33)                      | 0.07                              | <0.001                                        | 0.097 (0.094, 0.100)                                 |
| 5th (lowest SES)                      | 522 (75)                                               | 0.15 (0.02)                      | <0.001                            | 1,527 (906)                                            | 0.47 (0.29)                      | 0.04                              | <0.001                                        | 0.083 (0.078, 0.088)                                 |
| <b>Locality</b>                       |                                                        |                                  |                                   |                                                        |                                  |                                   |                                               |                                                      |
| Metropolitan                          | 5,187 (635)                                            | 0.20 (0.02)                      | Ref                               | 15,913<br>(10,015)                                     | 0.66 (0.45)                      | Ref                               | <0.001                                        | 0.132 (0.125, 0.138)                                 |
| Non-Metropolitan                      | 926 (102)                                              | 0.17 (0.02)                      | <0.001                            | 2,156 (1,392)                                          | 0.43 (0.29)                      | 0.1                               | <0.001                                        | 0.090 (0.085, 0.095)                                 |
| <b>Race and Ethnicity<sup>a</sup></b> |                                                        |                                  |                                   |                                                        |                                  |                                   |                                               |                                                      |
| Hispanic                              | 253 (29)                                               | 0.19 (0.02)                      | 0.75                              | 652 (412)                                              | 0.62 (0.42)                      | 0.98                              | <0.001                                        | 0.128 (0.123, 0.133)                                 |
| NH Asian                              | 80 (11)                                                | 0.20 (0.03)                      | 0.31                              | 208 (130)                                              | 0.64 (0.44)                      | 0.87                              | <0.001                                        | 0.134 (0.131, 0.138)                                 |
| NH Black                              | 170 (29)                                               | 0.19 (0.03)                      | 0.88                              | 472 (312)                                              | 0.63 (0.43)                      | 0.96                              | <0.001                                        | 0.123 (0.120, 0.135)                                 |
| NH Native American                    | 10 (2)                                                 | 0.19 (0.04)                      | 0.52                              | 26 (18)                                                | 0.62 (0.44)                      | 0.99                              | <0.001                                        | 0.122 (0.100, 0.143)                                 |
| NH White                              | 1,657 (183)                                            | 0.19 (0.02)                      | Ref                               | 4,464 (2,829)                                          | 0.62 (0.42)                      | Ref                               | <0.001                                        | 0.123 (0.118, 0.129)                                 |
| Unknown                               | 3,977 (491)                                            | 0.19 (0.02)                      | 0.99                              | 12,344 (7,759)                                         | 0.63 (0.42)                      | 0.63                              | <0.001                                        | 0.124 (0.120, 0.128)                                 |
|                                       | Stool DNA Test                                         |                                  |                                   |                                                        |                                  |                                   |                                               |                                                      |

|                                           | Pre- Recommendation<br>(1.8% of all tests)             |                                  |                                   | Post- Recommendation<br>(26.0% of all tests)           |                                  |                                   | P-value<br>Comparing<br>Pre- vs<br>Post-Onset | Bimonthly Percentage<br>Change (%; 95% CI) <sup>b</sup> |
|-------------------------------------------|--------------------------------------------------------|----------------------------------|-----------------------------------|--------------------------------------------------------|----------------------------------|-----------------------------------|-----------------------------------------------|---------------------------------------------------------|
|                                           | Mean<br>Frequency of<br>Beneficiaries<br>Screened (SD) | Mean CRC<br>Screening<br>(%, SD) | P-value<br>Comparing<br>Subgroups | Mean<br>Frequency of<br>Beneficiaries<br>Screened (SD) | Mean CRC<br>Screening (%;<br>SD) | P-value<br>Comparing<br>Subgroups |                                               |                                                         |
| <b>Overall</b>                            | 217 (286)                                              | 0.01 (0.01)                      |                                   | 8,154 (6,061)                                          | 0.28 (0.22)                      |                                   | <0.001                                        | 0.061 (0.057, 0.063)                                    |
| <b>Sex</b>                                |                                                        |                                  |                                   |                                                        |                                  |                                   |                                               |                                                         |
| Females                                   | 111 (146)                                              | 0.01 (0.01)                      | Ref                               | 4,410 (3,393)                                          | 0.31 (0.26)                      | Ref                               | <0.001                                        | 0.069 (0.067, 0.071)                                    |
| Males                                     | 105 (140)                                              | 0.01 (0.01)                      | 0.91                              | 3,744 (2,675)                                          | 0.26 (0.19)                      | 0.57                              | <0.001                                        | 0.052 (0.048, 0.055)                                    |
| <b>Social Deprivation<br/>Index</b>       |                                                        |                                  |                                   |                                                        |                                  |                                   |                                               |                                                         |
| 1st (highest SES)                         | 67 (88)                                                | 0.01 (0.01)                      | Ref                               | 2,650 (1,920)                                          | 0.33 (0.26)                      | Ref                               | <0.001                                        | 0.070 (0.067, 0.074)                                    |
| 2nd                                       | 53 (68)                                                | 0.01 (0.01)                      | <0.001                            | 1,955 (1,477)                                          | 0.30 (0.24)                      | 0.7                               | <0.001                                        | 0.066 (0.062, 0.070)                                    |
| 3rd                                       | 44 (57)                                                | 0.01 (0.01)                      | 0.78                              | 1,577 (1,210)                                          | 0.27 (0.22)                      | 0.46                              | <0.001                                        | 0.059 (0.057, 0.061)                                    |
| 4th                                       | 34 (46)                                                | 0.01 (0.01)                      | 0.67                              | 1,235 (921)                                            | 0.25 (0.19)                      | 0.31                              | <0.001                                        | 0.053 (0.051, 0.056)                                    |
| 5th (lowest SES)                          | 17 (25)                                                | 0.01 (0.01)                      | 0.32                              | 638 (468)                                              | 0.20 (0.15)                      | 0.08                              | <0.001                                        | 0.041 (0.038, 0.043)                                    |
| <b>Locality</b>                           |                                                        |                                  |                                   |                                                        |                                  |                                   |                                               |                                                         |
| Metropolitan                              | 178 (238)                                              | 0.01 (0.01)                      | Ref                               | 6,885 (5,045)                                          | 0.29 (0.22)                      | Ref                               | <0.001                                        | 0.061 (0.058, 0.064)                                    |
| Non-Metropolitan                          | 38 (47)                                                | 0.01 (0.01)                      | 0.98                              | 1,228 (993)                                            | 0.25 (0.21)                      | 0.59                              | <0.001                                        | 0.060 (0.056, 0.064)                                    |
| <b>Race and Ethnicity</b><br><sup>a</sup> |                                                        |                                  |                                   |                                                        |                                  |                                   |                                               |                                                         |
| Hispanic                                  | 9 (12)                                                 | 0.01 (0.01)                      | 0.85                              | 304 (235)                                              | 0.29 (0.24)                      | 0.92                              | <0.001                                        | 0.067 (0.063, 0.070)                                    |
| NH Asian                                  | 4 (5)                                                  | 0.01 (0.01)                      | 0.45                              | 95 (72)                                                | 0.30 (0.24)                      | 0.85                              | <0.001                                        | 0.064 (0.056, 0.072)                                    |
| NH Black                                  | 6 (8)                                                  | 0.01 (0.01)                      | 0.9                               | 205 (157)                                              | 0.27 (0.21)                      | 0.92                              | <0.001                                        | 0.060 (0.058, 0.061)                                    |
| NH Native<br>American                     | 1 (1)                                                  | 0.01 (0.02)                      | 0.92                              | 14 (11)                                                | 0.33 (0.26)                      | 0.57                              | <0.01                                         | 0.066 (0.058, 0.074)                                    |
| NH White                                  | 56 (74)                                                | 0.01 (0.01)                      | Ref                               | 2,023 (1,504)                                          | 0.28 (0.22)                      | Ref                               | <0.001                                        | 0.061 (0.058, 0.063)                                    |
| Unknown                                   | 141 (187)                                              | 0.01 (0.01)                      | 0.94                              | 5,512 (4,087)                                          | 0.28 (0.22)                      | 0.28                              | <0.001                                        | 0.060 (0.057, 0.063)                                    |

Abbreviations: CRC = Colorectal Cancer, NH = non-Hispanic, SD = Standard Deviation, SES = Socioeconomic Status

<sup>a</sup> Race and ethnicity information was available for 35.2% and 32.1% of beneficiaries during the pre-recommendation and post-recommendation periods, respectively.

<sup>b</sup> Results from autoregressive integrated moving average models estimating percentage change in screening uptake every 2 months during the post-recommendation period.



**eTable 4.** Percent of BCBS beneficiaries who were aged 45-49 years between 5/2021 to 12/2022 and received any screening for colorectal cancer before age 50

|                           | Total     | Ever Screened | Screening Uptake (%) |
|---------------------------|-----------|---------------|----------------------|
| Any Risk <sup>a</sup>     | 5,213,471 | 722,823       | 13.90%               |
| Average Risk <sup>b</sup> | 4,766,127 | 546,957       | 11.50%               |
| High Risk <sup>c</sup>    | 510,623   | 189,374       | 37.10%               |

<sup>a</sup> Includes individuals aged 45-49 years who ever had a screening before age 50 (i.e., screening could be done at ages 40-44)

<sup>b</sup> Includes individuals aged 45-49 with average risk of colorectal cancer who ever had a screening before age 50 when they were at average risk (i.e., screening could be done at ages 40-44). If a beneficiary was at average risk first then became high risk later, then screening conducted when the individual was at average risk was counted.

<sup>c</sup> Includes individuals aged 45-49 with high risk ever had a screening before age 50 no matter the screening was conducted when he/she was average or high risk.

**eTable 5.** Comparing CRC Screening Uptake by Social Deprivation Index within Each Race and Ethnicity Group Among Blue Cross Blue Shield Beneficiaries Aged 45-49 Years During the Post-Recommendation Period (May 2021 to December 2022)

|                                                         | Quintile of Social Deprivation Index |                 |                 |                 |                |
|---------------------------------------------------------|--------------------------------------|-----------------|-----------------|-----------------|----------------|
|                                                         | 1 (highest SES) <sup>b</sup>         | 2               | 3               | 4               | 5 (lowest SES) |
| <b>Non-Hispanic White</b>                               |                                      |                 |                 |                 |                |
| Bimonthly Mean Frequency (SD) of Beneficiaries Enrolled | 198,144 (7,191)                      | 161,443 (4,663) | 146,285 (4,178) | 123,808 (3,099) | 81,421 (1,318) |
| Bimonthly Mean Uptake (SD) of CRC Screening             | 1.82 (0.72)                          | 1.54 (0.63)     | 1.38 (0.56)     | 1.28 (0.49)     | 1.21 (0.42)    |
| P-value comparing with 1st quintile <sup>a</sup>        | Ref                                  | 0.99            | 0.19            | 0.04            | 0.01           |
| <b>Non-Hispanic Black</b>                               |                                      |                 |                 |                 |                |
| Bimonthly Mean Frequency (SD) of Beneficiaries Enrolled | 10,442 (253)                         | 8,382 (144)     | 7,550 (116)     | 6,417 (94)      | 4,254 (83)     |
| Bimonthly Mean Uptake (SD) of CRC Screening             | 1.86 (0.77)                          | 1.51 (0.62)     | 1.37 (0.59)     | 1.28 (0.49)     | 1.21 (0.45)    |
| P-value comparing with 1st quintile                     | Ref                                  | 0.87            | 0.16            | 0.05            | 0.02           |
| <b>Non-Hispanic Asian</b>                               |                                      |                 |                 |                 |                |
| Bimonthly Mean Frequency (SD) of Beneficiaries Enrolled | 4,596 (248)                          | 3,683 (164)     | 3,274 (124)     | 2,702 (131)     | 1,715 (89)     |
| Bimonthly Mean Uptake (SD) of CRC Screening             | 1.92 (0.79)                          | 1.53 (0.70)     | 1.36 (0.60)     | 1.31 (0.52)     | 1.23 (0.50)    |
| P-value comparing with 1st quintile                     | Ref                                  | 0.92            | 0.14            | 0.08            | 0.03           |
| <b>Non-Hispanic Native American</b>                     |                                      |                 |                 |                 |                |
| Bimonthly Mean Frequency (SD) of Beneficiaries Enrolled | 641 (29)                             | 485 (26)        | 405 (17)        | 344 (31)        | 216 (12)       |
| Bimonthly Mean Uptake (SD) of CRC Screening             | 1.82 (0.77)                          | 1.61 (0.88)     | 1.44 (0.72)     | 1.26 (1.02)     | 1.33 (0.91)    |
| P-value comparing with 1st quintile                     | Ref                                  | 0.99            | 0.99            | 0.91            | 0.92           |
| <b>Hispanic</b>                                         |                                      |                 |                 |                 |                |

|                                                         |                  |                 |                 |                 |                 |
|---------------------------------------------------------|------------------|-----------------|-----------------|-----------------|-----------------|
| Bimonthly Mean Frequency (SD) of Beneficiaries Enrolled | 14,742 (776)     | 12,069 (548)    | 10,798 (523)    | 9,092 (441)     | 5,831 (200)     |
| Bimonthly Mean Uptake (SD) of CRC Screening             | 1.80 (0.71)      | 1.53 (0.63)     | 1.38 (0.56)     | 1.29 (0.54)     | 1.24 (0.49)     |
| P-value comparing with 1st quintile                     | Ref              | 0.99            | 0.44            | 0.14            | 0.08            |
| <b>Unknown</b>                                          |                  |                 |                 |                 |                 |
| Bimonthly Mean Frequency (SD) of Beneficiaries Enrolled | 272,032 (12,042) | 225,061 (8,746) | 200,704 (7,503) | 168,993 (5,813) | 111,198 (3,165) |
| Bimonthly Mean Uptake (SD) of CRC Screening             | 1.84 (0.72)      | 1.56 (0.62)     | 1.40 (0.56)     | 1.29 (0.48)     | 1.18 (0.41)     |
| P-value comparing with 1st quintile                     | Ref              | 0.99            | 0.17            | 0.03            | 0.004           |

<sup>a</sup> P-values are from two-sided t-test comparing mean CRC screening uptake within each race and ethnicity subgroup based on social deprivation index

<sup>b</sup> SES = Socioeconomic Status

**eFigure:** Changes in colorectal cancer screening uptake among Blue Cross Blue Shield Axis beneficiaries aged 45-49 years with average risk of colorectal cancer, stratified by screening modalities.

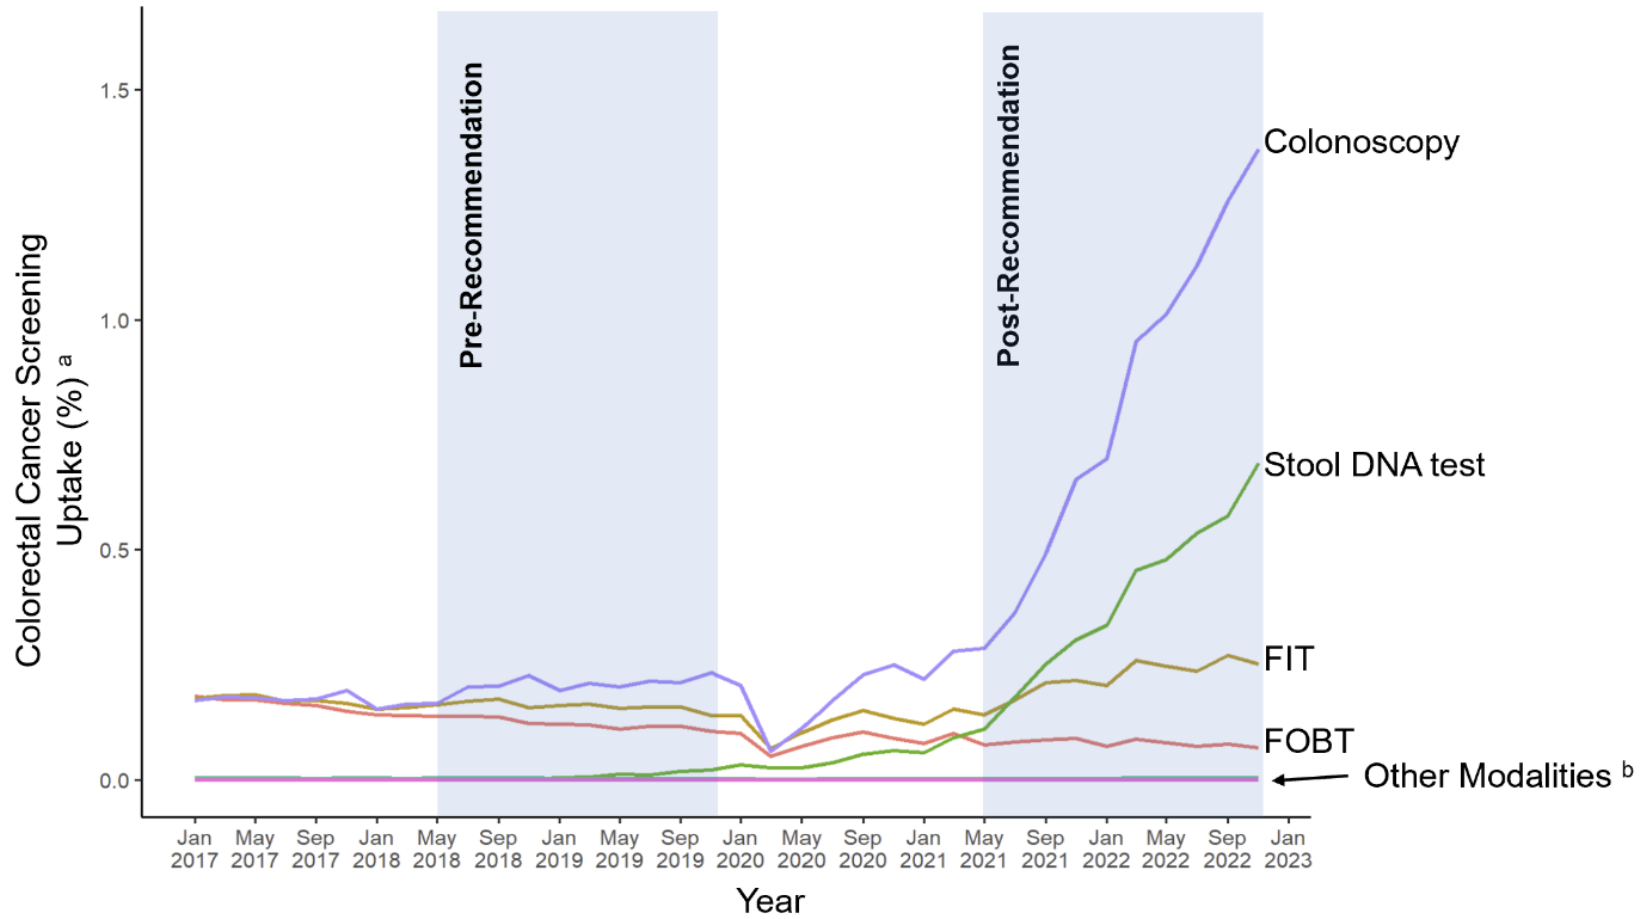

Footnote: <sup>a</sup> Screening uptake was calculated by dividing the number of BCBS beneficiaries aged 45-49 years who had 1) BCBS as the primary insurance for at least 12 months prior to the start of the period and remained enrolled through the end of the 2-month

period; and 2) did not receive CRC screening or related procedures in the 12 months preceding the 2-month period, by the subset of the denominator who received CRC screening. Footnote: <sup>a</sup> Screening uptake was calculated by dividing the number of BCBS beneficiaries aged 45-49 years who had 1) BCBS as the primary insurance for at least 12 months prior to the start of the period and remained enrolled through the end of the 2-month period; and 2) did not receive CRC screening or related procedures in the 12 months preceding the 2-month period, by the subset of the denominator who received CRC screening. Analyses examining specific screening modalities counted different modalities separately (colonoscopy yes/no, stool DNA test yes/no).

<sup>b</sup> Other modalities include flexible sigmoidoscopy, double-contrast barium enema, and CT colonography.

Abbreviations: FIT: Fecal immunochemical test, FOBT: Fecal occult blood test.

## eReferences

1. Fedewa SA, Star J, Bandi P, et al. Changes in Cancer Screening in the US During the COVID-19 Pandemic. *JAMA Netw Open*. 2022;5(6):e2215490.
2. Mazidimoradi A, Tiznobaik A, Salehiniya H. Impact of the COVID-19 Pandemic on Colorectal Cancer Screening: a Systematic Review. *J Gastrointest Cancer*. 2022;53(3):730-744.
3. El-Shabasy RM, Nayel MA, Taher MM, Abdelmonem R, Shoueir KR, Kenawy ER. Three waves changes, new variant strains, and vaccination effect against COVID-19 pandemic. *Int J Biol Macromol*. 2022;204:161-168.
4. Internal Revenue Service DoT, Employee Benefits Security Administration DoL, Centers for M, Medicaid Services DoH, Human S. Coverage of certain preventive services under the Affordable Care Act. Final rules. *Fed Regist*. 2013;78(127):39869-39899.
5. Engel-Nitz NM, Miller-Wilson LA, Le L, Limburg P, Fisher DA. Colorectal screening among average risk individuals in the United States, 2015-2018. *Prev Med Rep*. 2023;31:102082.
6. Rex DK, Boland CR, Dominitz JA, et al. Colorectal Cancer Screening: Recommendations for Physicians and Patients from the U.S. Multi-Society Task Force on Colorectal Cancer. *Am J Gastroenterol*. 2017;112(7):1016-1030.
7. Shaukat A, Kahi CJ, Burke CA, Rabeneck L, Sauer BG, Rex DK. ACG Clinical Guidelines: Colorectal Cancer Screening 2021. *Am J Gastroenterol*. 2021;116(3):458-479.
